# Supplementary material
Source: publisher figshare collection journal article supplement (https://karger.figshare.com/ndownloader/files/12738965)
Supplement: Supplementary file 1 [file 12738965]

**Suppl. Tab. 1**

| **# this study** | **phenotype** | **age (y)** | **karyotype** |
| --- | --- | --- | --- |
| 5 | none;  infertile | n.a. | 48,XY,+min(2)(:p11.2→q11.2:),+min(2)(:p11.1→q11.2:)[6]/ 47,XY,+min(2)(:p11.2→q11.2:)/47,XY,+min(2)(:p11.1→q11.2:)[cp5]/ 46,XY[34] |
| 7 | none;  infertile | 34 | 47,XY,+min(2)(:p11.1→q11.2:)[5%]/ 46,XY[95%] |
| 11 | none; RAB | 50 | 47,XY,+r(3)(::p12.1→q11.1::)[6]/47,XY,+min(3)(:p12.1→q11.1:)[2]/ 46,XY[2] |
| 12 | none;  infertile | n.a. | 47,XY,+min(3)(:p11.1→q11.1:)[84%]/ 46,XY[16%] |
| 13 | none;  infertile | 33 | 47,XY,+min(3)(:p11.1→q12:)[15%]/ 46,XY[85%] |
| 21 | none;  infertile | 36 | 47,XY,+min(6)(:p11.2→q11.1:)[60%]/ 46,XY[40%] |
| 29 | none;  infertile | 43 | 47,XY,+min(9)(:p11.1→q12:)[9]/ 46,XY[6] |
| 30 | none;  infertile | 43 | 47,XY,+min(9)(:p11.1→q11:)[67%]/ 46,XY[33%] |
| 38 | none;  infertile | 37 | 47,XY,+inv dup(13 or 21)(q10)[100%] |
| 39 | none;  infertile | 31 | 47,XY,+inv dup(13 or 21)(q10)[100%] |
| 40 | none;  infertile | 31 | 47,XY,+inv dup(13 or 21)(q10)[100%] |
| 41 | none;  infertile | 26 | 47,XY,+inv dup(13 or 21)(q10)[100%] |
| 42 | none;  infertile | 26 | 47,XY,t(4;17)(p15.2;q24.3)mat,+inv dup(13 or 21)(q10)[10]/ 46,XY,t(4;17)(p15.2;q24.3)mat[25] |
| 61 | none;  infertile; cryptozoospermia | 43 | 47,XY,+inv dup(14)(q11.1)[100%] |
| 62 | none;  infertile | n.a. | 47,XY,+inv dup(14)(q11.1)[100%] |
| 63 | none;  infertile | 32 | 47,XY,+inv dup(14)(q11.1)[16]/ 46,XY[84] |
| 64 | none;  infertile | 46 | 47,XY,+inv dup(14)(q11.1)[6]/ 46,XY[14] |
| 65 | none;  infertile; hypogonadotropic hypogonadism | 17 | 47,XY,+inv dup(14)(q11.1)[100%] |
| 66 | none;  infertile | 30 | 47,XY,+inv dup(14)(q11.1)[100%] |
| 67 | none;  infertile | n.a. | 47,XY,+inv dup(14)(q11.1)[100%] |
| 116 | none;  infertile | 30 | 47,XY,+inv dup(15)(q11.1)[100%] |
| 117 | none;  infertile | 34 | 47,XY,t(5p;12q),+inv dup(15)(q11.1)[100%] |
| 118 | none;  infertile | n.a. | 47,XY,+inv dup(15)(q11.1)[100%] |
| 119 | none;  infertile | n.a. | 47,XY,+inv dup(15)(q11.1)[100%] |
| 126 | none; RAB | 41 | 47,XY,+inv dup(15)(q11.2)[11]/ 46,XY[39] |
| 131 | none;  infertile | 37 | 47,XY,+inv dup(15)(q11.2)[9]/ 46,XY[12] |
| 132 | none;  infertile | n.a. | 47,XY,+inv dup(15)(q11.2)[20%]/ 46,XY[80%] |
| 133 | none;  infertile | 30y | 47,XY,+inv dup(15)(q11.2)[100%] |
| 139 | none; RAB | n.a. | 47,XY,+inv dup(15)(q12)[100%] |
| 158 | none;  infertile | n.a. | 47,XY,+min(16)(:p11.1→q11.1~11.2:)[8]/ 46,XY[42] |
| 177 | none;  infertile | 50 | 47,XY,+inv dup(22)(q11.1)[100%] |
| 178 | none;  infertile; OAT | 44 | 47,XY,+inv dup(22)(q11.1)[100%] |
| 179 | none;  infertile | 30 | 47,XY,+min(22)(pter→q11.1:)[100%] |
| 180 | none;  infertile | 37 | 47,XY,+min(22)(pter→q11.1:)[100%] |
| 190 | none;  infertile | n.a. | 47,XY,+inv dup(acro)(p10)[23]/ 46,XY[7] |
| 191 | none;  infertile | n.a. | 47,XY,+inv dup(acro)(p10)[50%]/ 46,XY[50%] |
| 194 | none;  infertile | 43 | 47,XY,+neo inv dup(acro)(p11)[50%]/ 46,XY[50%] |

**Suppl. Tab. 2**

| # | Percentage of sSMC | Details on sSMC | aCGH (mosaic) | aCGH (euchromatin) | aCGH (overall) |
| --- | --- | --- | --- | --- | --- |
|  | 70 | r(1)(::p11→q11::) | +/- | - | - |
|  | 53 | min(1)(:p11.1→q12:) | +/- | - | - |
|  | 64 | min(1)(:p11.1→q12:) | +/- | - | - |
|  | 50 | r(1) | ? | ? | ? |
|  | 48 | min(2)(:p11.2→q11.2:)/ min(2)(:p11.1→q11.2:) | - | + | +/- |
|  | 52 | r(2)(::p11.2→q12.1::) | +/- | + | +/- |
|  | 5 | min(2)(:p11.1→q11.2:) | - | + | - |
|  | 68 | mar(2)(:p11.1→q11.2:) | +/- | + | +/- |
|  | 100 | min(3)(:p12.2→q11.1:) | + | + | + |
|  | 29 | min(3)(:p12.1→q11.1~11.2:) | - | + | - |
|  | 80 | r(3)(::p12.1→q11.1::) | + | + | + |
|  | 84 | min(3)(:p11.1→q11.1:) | + | - | - |
|  | 15 | min(3)(:p11.1→q12:) | - | + | - |
|  | 46 | r(4)(::p12→q13.1::) | +/- | + | +/- |
|  | 62 | min(4)(:p11→q12:) | +/- | + | +/- |
|  | 3 | min(5)(pter→q11.1:) | - | + | - |
|  | 50 | min(5)(:p13.1→q11.1:) | +/- | + | +/- |
|  | 29 | min(5)(:p11→q11.1:) | - | - | - |
|  | 81 | min(5)(:p11→q11.1:) | + | - | - |
|  | 80 | min(5)(:p11→q11.1:) | + | - | - |
|  | 60 | min(6)(:p11.2→q11.1:) | +/- | + | +/- |
|  | 100 | dic(6;6)(:p11→q11::p11→q11:) | + | - | - |
|  | 82 | min(7)(:p11.1→q11.21:) | + | + | + |
|  | 88 | min(8)(:p11.21→q11.1:) | + | + | + |
|  | 41 | min(8)(:p11.1→q11.21:)/ min(8)(:p11.21→q11.1:) | - | + | - |
|  | 45 | ?r(8)(::p10→q12::) | +/- | + | +/- |
|  | 90 | mar(9)(::p12→q12::) | + | - | - |
|  | 100 | min(9)(:p12→q12:) | + | - | - |
|  | 60 | min(9)(:p11.1→q12:) | +/- | - | - |
|  | 67 | min(9)(:p11.1→q11:) | +/- | - | - |
|  | 100 | r(11)(::p11.12→q12.2::) | + | + | + |
|  | 66 | min(12)(:p12.2~12.1→q10:) | +/- | + | +/- |
|  | 10 | min(12)(:p11.2→q11:) | - | + | - |
|  | 100 | inv dup(13 or 21)(q10) | + | - | - |
|  | 40 | inv dup(13 or 21)(q10) | - | - | - |
|  | 100 | inv dup(13 or 21)(q10) | + | - | - |
|  | 100 | inv dup(13 or 21)(q10) | + | - | - |
|  | 100 | inv dup(13 or 21)(q10) | + | - | - |
|  | 100 | inv dup(13 or 21)(q10) | + | - | - |
|  | 100 | inv dup(13 or 21)(q10) | + | - | - |
|  | 100 | inv dup(13 or 21)(q10) | + | - | - |
|  | 100 | inv dup(13 or 21)(q10) | + | - | - |
|  | 100 | inv dup(13)(q11) or  inv dup (21)(q11.1) | + | - | - |
|  | 100 | inv dup(13)(q11) or  inv dup (21)(q11.1) | + | - | - |
|  | 100 | inv dup(13)(q11) or  inv dup (21)(q11.1) | + | - | - |
|  | 100 | inv dup(13)(q11) or  inv dup (21)(q11.1) | + | - | - |
|  | 100 | inv dup(13)(q11) or  inv dup (21)(q11.1) | + | - | - |
|  | 100 | inv dup(14)(q10) | + | - | - |
|  | 100 | inv dup(14)(q10) | + | - | - |
|  | 100 | inv dup(14)(q10) | + | - | - |
|  | 100 | inv dup(14)(q10) | + | - | - |
|  | 100 | inv dup(14)(q10) | + | - | - |
|  | 100 | inv dup(14)(q11.1) | + | - | - |
|  | 100 | inv dup(14)(q11.1) | + | - | - |
|  | 100 | inv dup(14)(q11.1) | + | - | - |
|  | 100 | inv dup(14)(q11.1) | + | - | - |
|  | 100 | inv dup(14)(q11.1) | + | - | - |
|  | 100 | inv dup(14)(q11.1) | + | - | - |
|  | 100 | inv dup(14)(q11.1) | + | - | - |
|  | 100 | inv dup(14)(q11.1) | + | - | - |
|  | 100 | inv dup(14)(q11.1) | + | - | - |
|  | 100 | inv dup(14)(q11.1) | + | - | - |
|  | 100 | inv dup(14)(q11.1) | + | - | - |
|  | 100 | inv dup(14)(q11.1) | + | - | - |
|  | 100 | inv dup(14)(q11.1) | + | - | - |
|  | 100 | inv dup(14)(q11.1) | + | - | - |
|  | 100 | inv dup(14)(q11.1) | + | - | - |
|  | 100 | r(14)(::p13→q11.1::) | + | - | - |
|  | 100 | r(14)(::p11.2→q11.2::) | + | + | + |
|  | 100 | mar(14 or 22) | + | ? | ? |
|  | 100 | mar(14 or 22) | + | ? | ? |
|  | 100 | mar(14 or 22) | + | ? | ? |
|  | ? | mar(14 or 22) | ? | ? | ? |
|  | 100 | inv dup(15)(q10) | + | - | - |
|  | 100 | inv dup(15)(q10) | + | - | - |
|  | 100 | inv dup(15)(q11) | + | - | - |
|  | 100 | inv dup(15)(q11) | + | - | - |
|  | 100 | inv dup(15)(q11) | + | - | - |
|  | 100 | inv dup(15)(q11) | + | - | - |
|  | 100 | inv dup(15)(q11) | + | - | - |
|  | 100 | inv dup(15)(q11) | + | - | - |
|  | 100 | inv dup(15)(q11) | + | - | - |
|  | 100 | inv dup(15)(q11) | + | - | - |
|  | 100 | inv dup(15)(q11) | + | - | - |
|  | 100 | inv dup(15)(q11) | + | - | - |
|  | 100 | inv dup(15)(q11) | + | - | - |
|  | 100 | inv dup(15)(q11) | + | - | - |
|  | 100 | inv dup(15)(q11)x2 | + | - | - |
|  | 100 | min(15)(p11→q11) | + | - | - |
|  | 100 | inv dup(15)(q11.1) | + | - | - |
|  | 100 | inv dup(15)(q11.1) | + | - | - |
|  | 100 | inv dup(15)(q11.1) | + | - | - |
|  | 100 | inv dup(15)(q11.1) | + | - | - |
|  | 100 | inv dup(15)(q11.1) | + | - | - |
|  | 100 | inv dup(15)(q11.1) | + | - | - |
|  | 100 | inv dup(15)(q11.1) | + | - | - |
|  | 100 | inv dup(15)(q11.1) | + | - | - |
|  | 100 | inv dup(15)(q11.1) | + | - | - |
|  | 100 | inv dup(15)(q11.1) | + | - | - |
|  | 100 | inv dup(15)(q11.1) | + | - | - |
|  | 100 | inv dup(15)(q11.1) | + | - | - |
|  | 100 | inv dup(15)(q11.1) | + | - | - |
|  | 100 | inv dup(15)(q11.1) | + | - | - |
|  | 100 | inv dup(15)(q11.1) | + | - | - |
|  | 100 | inv dup(15)(q11.1) | + | - | - |
|  | 100 | inv dup(15)(q11.1) | + | - | - |
|  | 100 | inv dup(15)(q11.1) | + | - | - |
|  | 100 | inv dup(15)(q11.1) | + | - | - |
|  | 100 | inv dup(15)(q11.1) | + | - | - |
|  | 100 | inv dup(15)(q11.1) | + | - | - |
|  | 100 | inv dup(15)(q11.1) | + | - | - |
|  | 100 | inv dup(15)(q11.1) | + | - | - |
|  | 100 | inv dup(15)(q11.1) | + | - | - |
|  | 100 | inv dup(15)(q11.1) | + | - | - |
|  | 100 | inv dup(15)(q11.1) | + | - | - |
|  | 100 | inv dup(15)(q11.1) | + | - | - |
|  | 100 | inv dup(15)(q11.1) | + | - | - |
|  | 100 | inv dup(15)(q11.1) | + | - | - |
|  | 100 | inv dup(15)(q11.1) | + | - | - |
|  | 100 | inv dup(15)(q11.1)x2 | + | - | - |
|  | 100 | inv dup(15)(q11.1)x2 | + | - | - |
|  | ? | r(15)(::p1?2→q11.1::) | ? | - | - |
|  | 100 | min(15)(:p11.1→q11.1:) | + | - | - |
|  | 100 | min(15)(:p11.1→q11.1:) | + | - | - |
|  | 100 | inv dup(15)(q11.2) | + | + | + |
|  | 100 | inv dup(15)(q11.2) | + | + | + |
|  | 100 | inv dup(15)(q11.2) | + | + | + |
|  | 100 | inv dup(15)(q11.2) | + | + | + |
|  | 100 | inv dup(15)(q11.2) | + | + | + |
|  | 100 | inv dup(15)(q11.2) | + | + | + |
|  | 100 | inv dup(15)(q11.2) | + | + | + |
|  | 100 | inv dup(15)(q11.2) | + | + | + |
|  | 100 | inv dup(15)(q11.2) | + | + | + |
|  | 100 | mar(15)(pter→q11.2:) | + | + | + |
|  | 100 | mar(15)(pter→q11.2:) | + | + | + |
|  | 100 | inv dup(15)(q11.2)x2 | + | + | + |
|  | 100 | inv dup(15)(q11.2~q12) | + | + | + |
|  | 100 | inv dup(15)(q11.2~q12) | + | + | + |
|  | 100 | inv dup(15)(q12) | + | + | + |
|  | 100 | inv dup(15)(q11.2~q13) | + | + | + |
|  | 100 | min(15) | + | ? | ? |
|  | 100 | mar(15) | + | ? | ? |
|  | 100 | inv dup(15) | + | ? | ? |
|  | 100 | inv dup(15) | + | ? | ? |
|  | 100 | inv dup(15) | + | ? | ? |
|  | 100 | inv dup(15) | + | ? | ? |
|  | 100 | inv dup(15) | + | ? | ? |
|  | 100 | inv dup(15) | + | ? | ? |
|  | 100 | inv dup(15) | + | ? | ? |
|  | 100 | inv dup(15) | + | ? | ? |
|  | 100 | inv dup(15) | + | ? | ? |
|  | 100 | inv dup(15) | + | ? | ? |
|  | 100 | inv dup(15) | + | ? | ? |
|  | 100 | inv dup(15) | + | ? | ? |
|  | 100 | der(15)(pter→p11.2::q11.1→ q11.2::p11.2→pter) | + | + | + |
|  | 100 | der(15)t(9;15)(p24;q11.2) | + | + | + |
|  | 30 | r(16)(::p11.1→q12.1::) | - | + | - |
|  | 16 | min(16)(:p11.1→q11.1~11.2:) | - | +/- | - |
|  | 60 | r(16) | +/- | ? | ? |
|  | 67 | min(17)(:p11.2→q11.1:) | +/- | + | +/- |
|  | 4 | mar(20) | - | ? | ? |
|  | 80 | mar(20) | + | ? | ? |
|  | 100 | r(21)(::p11.1→q11.2::) | + | + | + |
|  | 100 | r(21)(::p11.2→q21.1::) | + | + | + |
|  | 64 to 81 | inv dup(22)(q10~11.1) | +/- | - | - |
|  | 100 | inv dup(22)(q10~11.1) | + | - | - |
|  | 100 | inv dup(22)(q10~11.1) | + | - | - |
|  | 100 (mat) | inv dup(22)(q10~11.1) | + | - | - |
|  | 100 | inv dup(22)(q10~11.1) | + | - | - |
|  | 100 | inv dup(22)(q10~11.1) | + | - | - |
|  | 100 | inv dup(22)(q10~11.1) | + | - | - |
|  | 100 (pat) | inv dup(22)(q10~11.1) | + | - | - |
|  | 100 | inv dup(22)(q10~11.1) | + | - | - |
|  | 100 | inv dup(22)(q10~11.1) | + | - | - |
|  | 100 | inv dup(22)(q10~11.1) | + | - | - |
|  | 100 | inv dup(22)(q10~11.1) | + | - | - |
|  | 100 | inv dup(22)(q10~11.1) | + | - | - |
|  | 100 | inv dup(22)(q10~11.1) | + | - | - |
|  | 100 | min(22)(pter→q11.1:) | + | - | - |
|  | 100 | min(22)(pter→q11.1:) | + | - | - |
|  | 100 | min(22)(pter→q11.1)[5]/ inv dup(22)(q11.1)[5] | + | - | - |
|  | 10 | r(22)(::p1?2→q11.1::) | - | - | - |
|  | 100 | inv dup(22)(q11.21) | + | + | + |
|  | 50 | min(22)(pter→q11.21:) | +/- | + | +/- |
|  | 100 | inv dup(22) | + | ? | ? |
|  | 100 | inv dup(acro)(p10) | + | - | - |
|  | 100 | inv dup(acro)(p10) | + | - | - |
|  | 25 | inv dup(acro)(p10) | - | - | - |
|  | 80 | inv dup(acro)(p10) | + | - | - |
|  | 80 | inv dup(acro)(p10) | + | - | - |
|  | 80 | inv dup(acro)(p10) | + | - | - |
|  | 100 | neo inv dup(acro)(p11) | + | - | - |
|  | 78 | neo inv dup(acro)(p11) | + | - | - |
|  | 100 | neo inv dup(acro)(p11) | + | - | - |
|  | 97 | r(1)(::p32→p36.1::) | + | + | + |
|  | 100 | r(6)(::p22.3→q10::) | + | + | + |
|  | 97 | r(13)(::q12.3→q22::) | + | + | + |
|  | 100 | r(15)(::q11.1→q21.1::) | + | + | + |
